# Supplementary material for: Highly anisotropic titanates from electrospun TiO2–SiO2composite nanofibers and rice grain-shaped nanostructures
Source: Royal Society of Chemistry journal article supplement (doi:10.1039/c1ra00466b), 2011-12-03
Supplement: c1ra00466b.pdf [file c1ra00466b.pdf]

## Electronic Supplementary Information

# Highly Anisotropic Titanates from Electrospun TiO<sub>2</sub>-SiO<sub>2</sub> composite nanofibers and rice grain- shaped Nanostructures

*A. Sreekumaran Nair,<sup>\*a</sup> Zhu Peining,<sup>b</sup> Veluru Jagadeesh Babu,<sup>a</sup> Yang Shengyuan,<sup>c</sup> Peng Shengjie,<sup>d</sup> and Seeram Ramakrishna<sup>b</sup>*

<sup>a</sup> *Healthcare and Energy Materials Laboratory, Nanoscience and Nanotechnology Initiative, National University of Singapore 117584, Singapore Fax: +65-6773 0339; Tel: +65-6516 6593; E-mail: [nniansn@nus.edu.sg](mailto:nniansn@nus.edu.sg); [seeram@nus.edu.sg](mailto:seeram@nus.edu.sg)*

<sup>a</sup> *Department of Mechanical Engineering, National University of Singapore 117574, Singapore*

<sup>c</sup> *NUS Graduate School for Integrative Sciences and Engineering, Singapore 117456, Singapore*

<sup>d</sup> *School of Materials Science and Engineering, Nanyang Technological University, Singapore 639798, Singapore*

### Supporting Information 1 (SI-1)

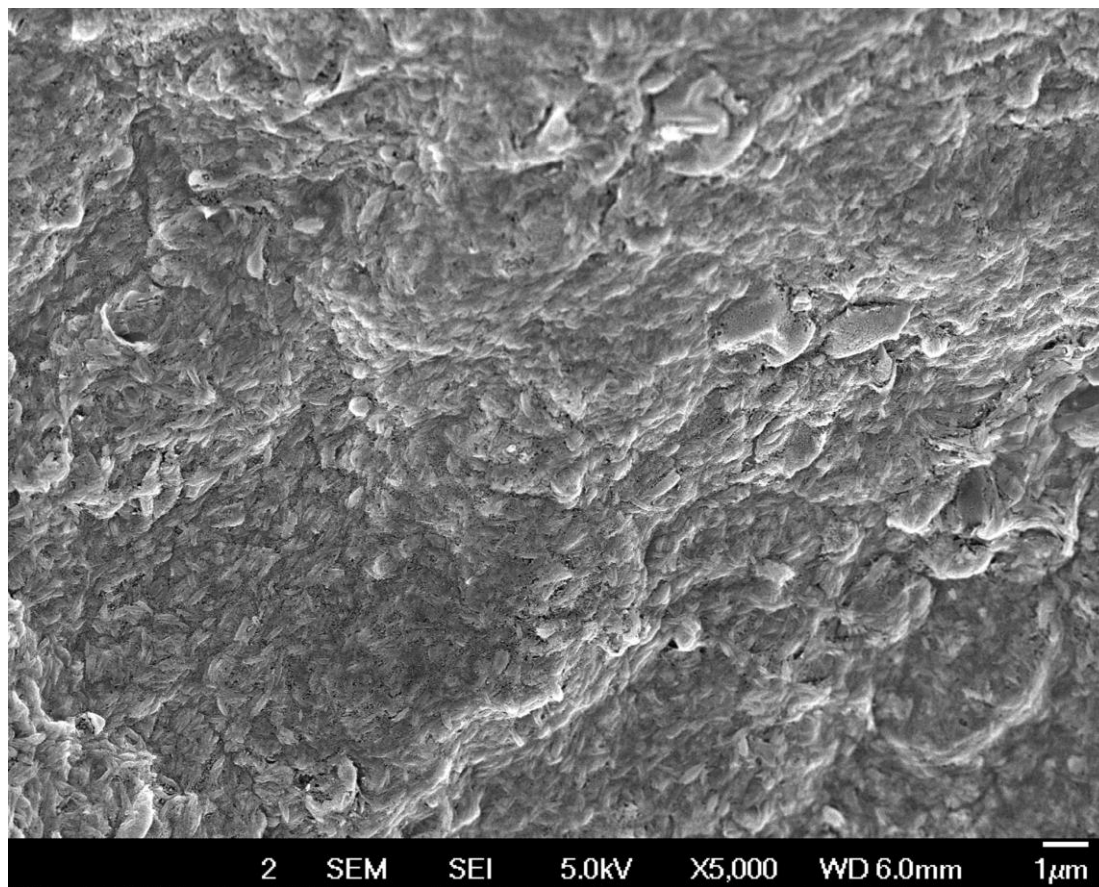

SEM image of the nanostructures obtained from the composition (1 mL TiO<sub>2</sub> precursor and 1 mL SiO<sub>2</sub> precursor in PVAc). The rice grain-like morphology is poorly defined at high SiO<sub>2</sub> precursor concentrations.

## Supporting Information 2 (SI-2)

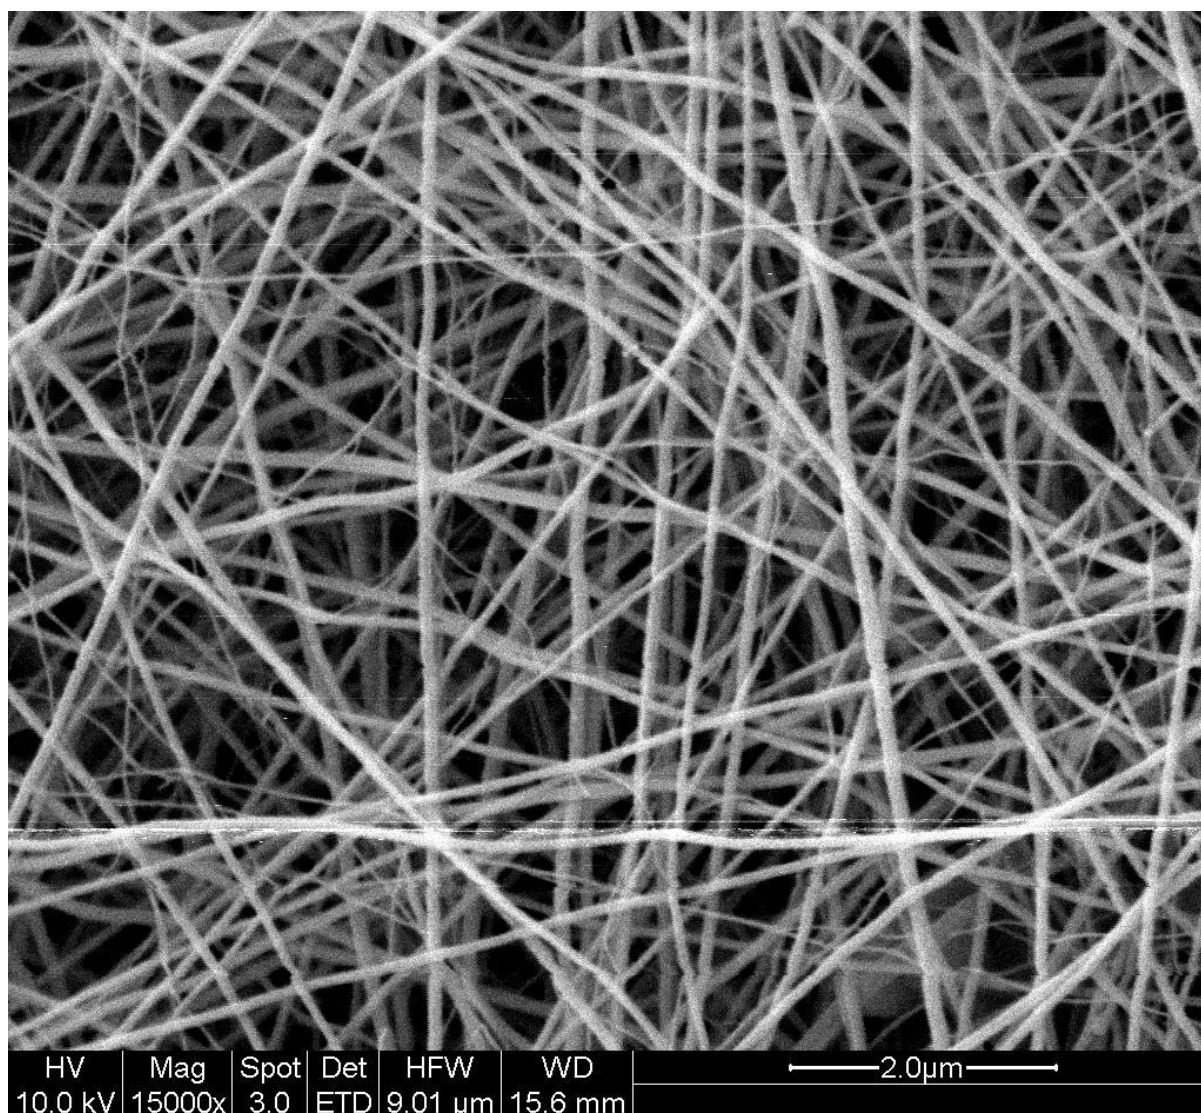

SEM image of the electrospun TiO<sub>2</sub> nanofibers. The fibers were continuous with an average diameter of ~ 120 nm.

### Supporting Information 3 (SI-3)

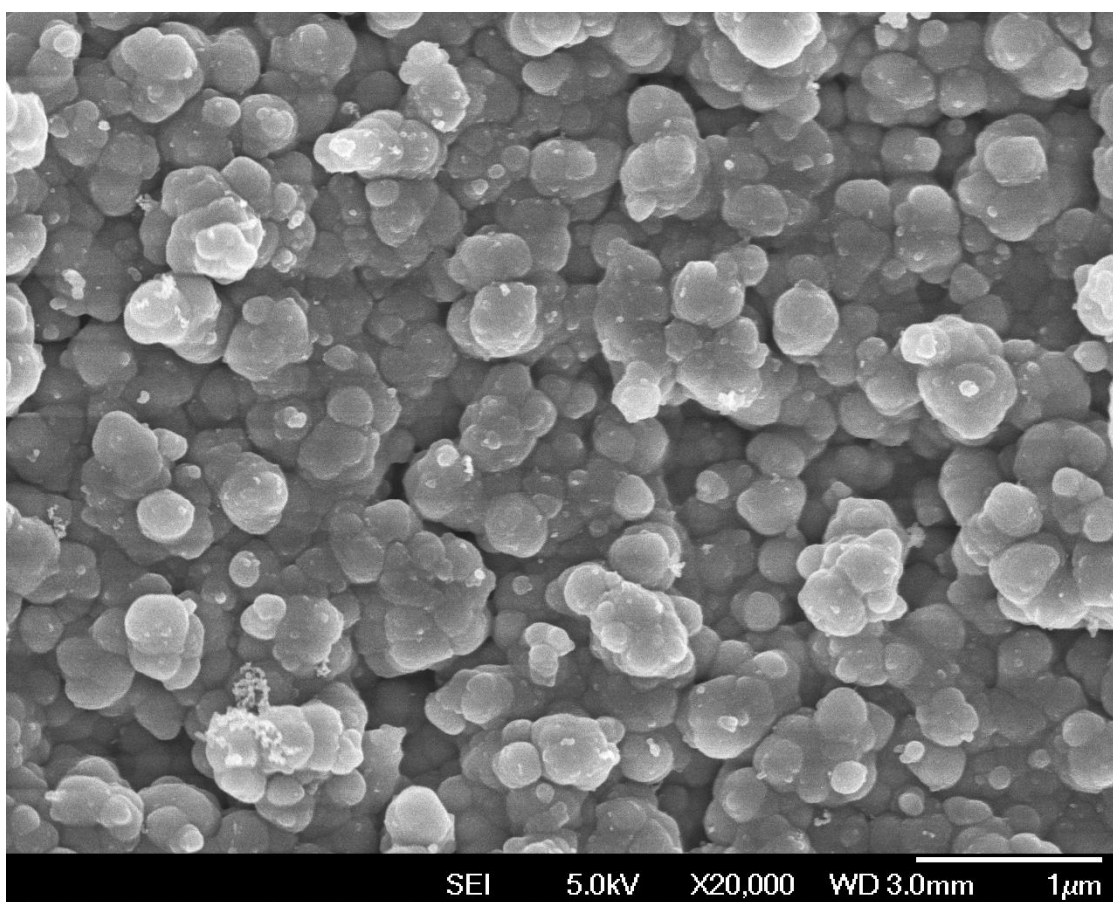

SEM image of the titanate nanoparticles obtained from rice grain-shaped  $\text{TiO}_2\text{-SiO}_2$  composites for extended reaction time (72 h) at high temperature ( $150^\circ\text{C}$ ).
